# Supplementary material for: The evolution and structure of snake venom phosphodiesterase (svPDE) highlight its importance in venom actions
Source: eLife journal article supplement (doi:10.7554/elife.83966), 2023-04-06
Supplement: supp [file elife-83966-supp-v1.zip]

(A) Putative core promoter of PDE-E1a

|                                  | TATA-Box                                                                                            | Putative initiator |
|----------------------------------|-----------------------------------------------------------------------------------------------------|--------------------|
| P  <i>P. molurus</i> (Python)    | TTTGTAAAA-----GCAGAAGCACGTTATCTGGAAAATGAGAGTAAGGAGTACCTATCTGATAAAATATCTCTAAAATACATCTCTTTCTAGG       |                    |
| V  <i>P. flavoviridis</i> (Habu) | TCTCTGGCA-----GTAAAAATATATTATTTTGGAGAGGGAAGAAAATGAGAAACTATTTGATAAAACACCTCTAACATGCATCTGCCTTTAGG      |                    |
| V  <i>B. jararaca</i> (Jararaca) | TCTCTGTCATTTtGTTAAAGTAAAAATATATTATTTTGGAGAGGGAAGAAAatgataaaCTATTTGAtaaaacacctcTAACATGCATCTGCCTTTAGG |                    |
| V  <i>P. mucrosquamatus</i> (TH) | TCTCTGGCA-----GTAAAAATATATTATTTTGGAGAGGGAAGAAAATGAGAAACTATTTGATAAAACACCTCTAACATGCATCTGCCTTTAGG      |                    |
| V  <i>C. viridis</i> (PR)        | TCTCTGGCATTtTGTAAAGTAAAAATATATTATTTTGGAGAGGGAAGAAAATGAGAAACTATTTGATAAAACACCTCTAACATGCATCTGCCTTTGGG  |                    |
| V  <i>C. tigris</i> (TR)         | TCTCTGGCATTtTGTAAAGTAAAAATATATTATTTTGGAGAGGGAAGAAAATGAGAAACTATTTGATAAAACACCTCTAACATGCATCTGCCTTTGGG  |                    |
| H  <i>M. thanlyinensis</i>       | TCTCCAGTGTtTGTAA-AGTAAAGTATATTATCTGGATGGGAGGAAA-----ATATTTGA-----TAACATACATCTGCTTTTAGG              |                    |
| C  <i>T. sirtalis</i> (CGS)      | TCTCTGGAATTTTGTAAAG-----TATATTATCTGGTCCAGGAGGAGA-----ATATTTGA-----TAACATGCCTCTGTCTTTAGG             |                    |
| C  <i>P. guttatus</i> (CS)       | TCTCTGTCATTTtGTTAAATAAAAAGTATATTATCTGGCACAGGAGGAAA-----ATATTTGA-----TAATATGCATCTGCCTTAAGG           |                    |
| C  <i>P. catenifer</i> (GS)      | TCTCTGTCATTTtGTTAAATAAAAAGTATATTATCTGGCACAGGAGGAAA-----ATATTTGA-----TAATATGCATCTGCCTTAAGG           |                    |
| C  <i>P. obsoletus</i> (WRS)     | TCTCTGTCTATTtGTAAAAATAAAAAGTATATTATCTGGCACAGGAGGAAA-----ATATTTGA-----TAATATGCATCTGCCTTAAGG          |                    |
| C  <i>T. elegans</i> (WTGS)      | TCTCTGGAATTTtGTAAAG-----TATATTATCTGGTCCAGGAGGAGA-----ATATTTGA-----TAACATGCCTCTGTTTTTAGG             |                    |
| E  <i>O. hannah</i> (KC)         | TCTCTGTCTATTtGTAAAAATACAGGTATACTATTCTGGTGCAGGAGGAAA-----ATATTTGA-----TAATATGCACCTGCGTTTAGG          |                    |
| E  <i>P. textilis</i> (EBS)      | TCTCTGTCTATTtGTAAAAATACAAGTATACTATTCTGGTGCAGGAGGAAA-----ATATTTGA-----TAATATGCACCTGCGTTTAGG          |                    |
| E  <i>N. scutatus</i> (MTS)      | TCTCTGTCTATTtGTAAAAATACAAGTATACTATTCTGGTGCAGGAGGAAA-----ATATTTGA-----TAATATGCACCTGCGTTTAGG          |                    |
| E  <i>N. naja</i> (IC)           | TCTCTGTCTATTtGTAAAAATACAAGTATACTATTCTGGTGCAGGAGGAAA-----ATATTTGA-----TAATATGCACCTGCACTTTAGG         |                    |
| Hy  <i>H. curtus</i> (SSS)       | TCTCTGTCTATTtGTAAAAATACAAGTATACTATTCTGGTGCAGGAGGAAA-----ATATTTGA-----TAATATGCACCTGCGTTTAGG          |                    |
| Hy  <i>H. cyanocinctus</i> (BSS) | TCTCTGTCTATTtGTAAAAATACAAGTATACTATTCTGGTGCAGGAGGAAA-----ATATTTGA-----TAATATGCACCTGCGTTTAGG          |                    |

(B) Alternative translation start sites recruited by 3' elongation of PDE-E1a in Dipsadidae and Lamprophiidae

|                                  | PDE-E1a                                                                                                                            | E2              |
|----------------------------------|------------------------------------------------------------------------------------------------------------------------------------|-----------------|
| P  <i>P. molurus</i> (Python)    | GCAACAGAGTGGAGAGATGACCCAGCAGAAG-----                                                                                               | GTTCTTTTCATTTTC |
| V  <i>P. flavoviridis</i> (Habu) | GGAACCAGAGTGGAGAGATGATTACGCAGAAG-----                                                                                              | GTTCTTTTCATTTTC |
| V  <i>P. mucrosquamatus</i> (TH) | GGAACCAGAGTGGAGAGATGATTACGCAGAAG-----                                                                                              | GTTCTTTTCATTTTC |
| V  <i>C. viridis</i> (PR)        | GGAACCAGAGTGGAGAGATGATTACGCAGAAG-----                                                                                              | GTTCTTTTCATTTTC |
| V  <i>C. tigris</i> (TR)         | GGAACCAGAGTGGAGAGATGATTACGCAGAAG-----                                                                                              | GTTCTTTTCATTTTC |
| H  <i>M. thanlyinensis</i>       | GGAACA--GCGGAGAGATGAGTCTGCCGAAG-----                                                                                               | GTTCTTTTCATTTTC |
| H  <i>H. buccata</i> (MWS)       | GGAACA--GCTGAGAGATGATTCTGCCGAAG-----                                                                                               | GTTCTTTTCATTTTC |
| C  <i>T. sirtalis</i> (CGS)      | GAAACAGAGTGGAGAGATGAGTCTGCAGAAG-----                                                                                               | GTTCTTTTCATTTTC |
| C  <i>P. guttatus</i> (CS)       | GGAACAGAGTGGAGAGATGAGTCTGCAGAAG-----                                                                                               | GTTCTTTTCATTTTC |
| C  <i>T. conanti</i> (MK)        | GAAACAGAGTGGAGAGATGAGTCTGCAGAAG-----                                                                                               | GTTCTTTTCATTTTC |
| C  <i>T. nigriceps</i> (PBS)     | GGAACCAGAGTGGAGAGATGATTACGCAGAAG-----                                                                                              | GTTCTTTTCATTTTC |
| D  <i>C. lineatus</i>            | GGAACAGAGTGGAGAGATGAGTCTGCAGAAGGTAAGGCATAGATACCAGGATAGGAAATTTGGGACCAAGATCTGGATCCCACCATGCTAAAATTCTGAAGGACTCATCCAAAGGTTCTTTTCATTTTC  | GTTCTTTTCATTTTC |
| L  <i>P. subtaeniatus</i> (WYSS) | GGAACAGAGTAGAGAGACGAGTCTGCAGAAGGTAAGGCATAGACACCAGGATTGGAACCTGGGACCAAGATCTGGATCTCGACCATGCTAAAAGTTCTTAAGGACTCATCCAAAGGTTCTTTTCATTTTC | GTTCTTTTCATTTTC |
| L  <i>P. schokari</i> (SSR)      | GGAACAGAGTAGAGAGACGAGTCTGCAGAAGGTAAGGCATAGACACCAG-ATTGGAACCTGGGACCAAGATCTGGATCTCGACCATGCTAAAAGTTCTTAAGGACTCATCCAAAGGTTCTTTTCATTTTC | GTTCTTTTCATTTTC |
| L  <i>M. monspessulanus</i> (MS) | GGAACAGAGTGGAGAAATGAGTCTGCAAAAG-----                                                                                               | GTTCTTTTCATTTTC |
| E  <i>O. hannah</i> (KC)         | GGAACA--GTGGAGAGATGATTATGCAGAAT-----                                                                                               | GTTCTTTTCATTTTC |
| E  <i>N. naja</i> (IC)           | GGAACA--GTGGAGAGATGTTATGCAGAAG-----                                                                                                | GTTCTTTTCATTTTC |
| E  <i>N. scutatus</i> (MTS)      | GGAACA--ATG-----CAGAAG-----                                                                                                        | GTTCTTTTCATTTTC |
| E  <i>L. colubrina</i> (YSK)     | GGAACA--ATGGAGAGATGATTATGCAGAAG-----                                                                                               | GTTCTTTTCATTTTC |
| Hy  <i>H. curtus</i> (SSS)       | GGAACA--ATG-----CAGAAG-----                                                                                                        | GTTCTTTTCATTTTC |
| Hy  <i>H. cyanocinctus</i> (BSS) | GGAACA--ATG-----CAGAAG-----                                                                                                        | GTTCTTTTCATTTTC |

(C) Putative core promoter of PDE-E1b

|                                  | TATA-Box                                                                                          | Putative initiator | DPE (Downstream promoter element) |
|----------------------------------|---------------------------------------------------------------------------------------------------|--------------------|-----------------------------------|
| E  <i>O. hannah</i> (KC)         | GAAGATTTGATATTTAGAAAGAGTGCCATCTTATGGTCAAAAATTTAACTTGTTTTTTTT---AAAGGATACTGTTTCTTAAAGAACTTTAAGG    |                    |                                   |
| E  <i>P. textilis</i> (EBS)      | GAAGATTCGATATAAC-AAAGAGTTCATCTTGTGG-CAAAAATCTAACTTGTTTTTTTTT---AAAGGATACTGTTTCTTAAAGAACTTTAAGG    |                    |                                   |
| E  <i>N. scutatus</i> (MTS)      | GAAGATTTGATATAAC-AAAGAGTGCCATCTTGTGGCCAAAAATTTAACTTGTTTTTTTTT---AAAGGATACTGTTTCTTAAAGAACTTTAAGG   |                    |                                   |
| E  <i>L. colubrina</i> (YSK)     | TGTGATTTGATATAAC-AAAGAGTGCCATCTTGTGGCCAAAAATTTAACTTGTTTTTTTTT---AAAGGATACTGTTTCTTAAAGAACTTTAAGG   |                    |                                   |
| E  <i>N. naja</i> (IC)           | GAAGATTTAATATAAC-AAAGAGTGCCATCTTATGGTCAAAAATTTAACTTTTTTTTTTT---AAAGGATACTGTTTCTTAAAGAACTTTAAGG    |                    |                                   |
| Hy  <i>H. curtus</i> (SSS)       | GAAGATTTGAAATAAC-AAAGAGTGCCATCTTGTGGCCAAAAATTTAACTTTGCTTTTTTTTT---AAAGGATATTGTTTCTTAAAGAACTTTAAGG |                    |                                   |
| Hy  <i>H. cyanocinctus</i> (BSS) | GAAGATTTGAAATAAC-AAAGAGTGCCATCTTGTGGCCAAAAATTTAACTTTGCTTTTTTTTT---AAAGGATATTGTTTCTTAAAGAACTTTAAGG |                    |                                   |
| CSME  <i>P. textilis</i> (EBS)   | GAAGACTTAGCATAAT-AAAGAGTGCCATCTCAGTT---AAACTCAACTTGTTTTCTTTTAAAAAAC-CTTGTTTCTT---GAAATTGCATG      |                    |                                   |
| CSME  <i>L. colubrina</i> (YSK)  | GAAGACTTAGCATAAT-AAAGAGTGCCATCTCAGTT---AAACTCAACTTGTTTTCTTTTAAAAAAC-CTTGTTTCTT---GAAATTGCATG      |                    |                                   |
| CSME  <i>H. curtus</i> (SSS)     | GAAGACTTAGCATAAT-AAAGAGTGCCATCTCAGTT---AAACTCAACTTGTTTTCTTTTAAAAAAC-CTTGTTTCTT---GAAATTGCATG      |                    |                                   |

Homologous region in the consensus sequence of mobile element DR0148352

Abbreviations  
TH: Taiwanese habu, PR: Prairie rattlesnake, TR: Terrestrial rattlesnake, CGS: Common garter snake, CS: Corn snake, GS: Gopher snake, WRS: Western rat snake, WTGS: Western terrestrial garter snake, MK: Milk snake, PBS: Plain black-headed snake, WYSS: Western yellow-bellied sand snake, SSR: Schokari sand racer, MS: Montpellier snake, KC: King cobra, EBS: Eastern brown snake, MTS: Mainland tiger snake, YSK: Yellow-lipped sea krait, IC: India cobra, SSS: Shaw's sea snake and BSS: Blue-banded sea snake. P: Pythonidae, V: Viperidae, H: Homalopsidae, C: Colubridae, E: Elapidae, Hy: Hydrophiidae and CSME: Consensus sequence of mobile element DR0148352.
