# Supplementary material for: The evolution and structure of snake venom phosphodiesterase (svPDE) highlight its importance in venom actions
Source: eLife journal article supplement (doi:10.7554/elife.83966), 2023-04-06
Supplement: supp [file elife-83966-supp-v1.zip]

|                          |                                                                                                                                                                                        |
|--------------------------|----------------------------------------------------------------------------------------------------------------------------------------------------------------------------------------|
|                          | <b>F1</b> ..... <b>F2</b>                                                                                                                                                              |
| <i>N. naja</i> ENPP3     | ATGGAAACTCTCCAGAAAATGAGACAGATGTGGGAGAGAAGAGCACTTTGGACCTGATAGATTCCCATTACGAGACAGTTACTAAAAGAAGCACTCTTATGAAATATAAGATACTCTGTGTTGTTCTTTTCATTTCCTTGGTGGCTGTAGCCCTTGGACTAGGTTTAGGGCTTGA        |
| <i>N. naja</i> ENPP3     | M E T L P E N E T D V G E K S T L D L I D S H Y E T V I K R S T L M K Y K I L C V V L F I S L V A V A L G L G L G L G                                                                  |
| <i>N. atra</i> ENPP3     | ATGGAAACTCTCTCCAGAAAATGAGACAGATGTGGGAGAGAAGAGCACTTTGGACCTGATAGATTCCCATTACGAGACAGTTATTAAAAGAAGCACTCTTATGAAATATAAGATACTCTGTGTTGTTCTTTTCATTTCCTTGGTGGCTGTAGCCCTTGGACTAGGTTTAGGGCTTGA      |
| <i>N. atra</i> ENPP3     | M E T L P E N E T D V G E K S T L D L I D S H Y E T V I K R S T L M K Y K I L C V V L F I S L V A V A L G L G L G L G                                                                  |
| <i>N. atra</i> PDE(5GZ4) | -----                                                                                                                                                                                  |
|                          | <b>F3</b> ..... <b>F4</b>                                                                                                                                                              |
| <i>N. naja</i> ENPP3     | CTGAAACAATCTAAGCAACCACTAGAGAGCTGCAGAAACAGATGTAATGAGACATTCAGTGAAGAGCTATCGTACTGTAGTTGTGATAACAAGTGTACAGAACGCAAAGCTTGCTGCTGGGATTATCAGGATACTTGTGTGCTACCAACTCAGAGTTGGTCTTGCAATAAATTACGT      |
| <i>N. naja</i> ENPP3     | L K Q S K Q P L E S C R N R C N E T F S E E L S Y C S C D N K C T E R K A C C W D Y Q D I C V L P T Q S W S C N K L R                                                                  |
| <i>N. atra</i> ENPP3     | CTGAAACAATCTAAGCAACCACTAGAGAGCTGCAGAAACAGATGTAATGAGACATTCAGTGAAGAGCTATCATACTGTAGTTGTGATAACAAGTGTACAGAACGCAAAGCTTGCTGCTGGGATTATCAGGATATTGTGTGCTACCAACTCAGAGTTGGTCTTGCAATAAATTACGT       |
| <i>N. atra</i> ENPP3     | L K Q S K Q P L E S C R N R C N E T F S E E L S Y C S C D N K C T E R K A C C W D Y Q D I C V L P T Q S W S C N K L R                                                                  |
| <i>N. atra</i> PDE(5GZ4) | L K Q S K Q P L E S C R N R C N E T F S E E L S Y C S C D N K C T E R K A C C W D Y Q D I C V L P T Q S W S C N K L R                                                                  |
|                          | <b>F5</b> ..... <b>F6</b>                                                                                                                                                              |
| Identical exons          | TGTGGTGAGAAGCGAATGGCCAATGTATTATGCTCCTGTTCTGAAGACTGCTTGACGAAAAAAGATTGCTGTACAGACTACAAAAGCATCTGCAAAAGAGAAAACATCATGGCTGAAAGATCAGTGTGCTTCTTCTAGTGCTTCTCAGTGTCCAGAAGGGTTTGATCAGTCCCACT       |
| Identical peptides       | C G E K R M A N V L C S C S E D C L T K K D C C T D Y K S I C K R E T S W L K D Q C A S S S A S Q C P E G F D Q S P L                                                                  |
|                          | <b>F7</b> ..... <b>F8</b>                                                                                                                                                              |
| Identical exons          | ATTCTTTTTTCAATGGATGGCTTTAGGGCTGAATATTTGGAAACCTGGGATACTTTAATGCCAATATCAATAAGCTTAAACTTGTGGGACTCATGCCAATACATGAGAGCTGTTTATCCAACCAAAACCTTTGTAACCACCTACATATTGTTACAGGCTTGATGCAGAAACC           |
| Identical peptides       | I L F S M D G F R A E Y L E T W D T L M P N I N K L K T C G T H A K Y M R A V Y P T K T F V N H Y T I V T G L Y A E T                                                                  |
|                          | <b>F9</b> .....                                                                                                                                                                        |
| Identical exons          | CATGGCATTATTGACAATAATATGTATGATGTGAAATTAATCAGAACTTCTCACTTTCTGGAAGTAACATGAGAAATGCTGCCTGGTGGGGTGGACAACCTATTTGGCATAACAGCAAGCTATCAAGGTTTGAAAGCAGCCACCTACTTTTGGCCTGGATCTGAAGTAAAAATAAAT      |
| Identical peptides       | H G I I D N N M Y D V K L N Q N F S L S G S N M R N A A W W G G Q P I W H T A S Y Q G L K A A T Y F W P G S E V K I N                                                                  |
|                          | <b>F10</b> ..... <b>F11</b> ..... <b>F12</b>                                                                                                                                           |
| Identical exons          | GGATCTTACCCAATATATACAAAGTTTATAACAAATCAACTCCATTGGAAGCAAGAGTTATGGAGGTGCTAAAGTGGCTAGATCTCCCAAGAGCTAAGAGGCCAGATTTCTCCACATTGTATATTGAGGAACCGGACACAACCTGGACATAAATTTGGACCTGTTAGTGGACAAGTA      |
| Identical peptides       | G S Y P T I Y K V Y N K S T P F E A R V M E V L K W L D L P K A K R P D F S T L Y I E E P D T T G H K F G P V S G Q V                                                                  |
|                          | <b>F13</b> .....                                                                                                                                                                       |
| <i>N. naja</i> ENPP3     | ATTAAGTCTTTACAAATGGCAGATCGGACCTGGGAATGTTGATGGAAGGCCTAAAGCAAAGGAATCTGCATAATTGTGTCAATCTTATCCTTCTGGCTGATCATGGCATGGAGGCAATATCCTGTAAACCGCTGAATACATGGAATACATGACTGATTATTTAATACAGTTGATTTTTTATG |
| <i>N. atra</i> ENPP3     | ATTAAGTCTTTACAAATGGCAGATCGGACCTGGGAATGTTGATGGAAGGCCTAAAGCAAAGGAATCTGCATAATTGTGTCAATCTTATCCTTCTGGCTGATCATGGCATGGAGGCAATATCCTGTAAACCGCTGAATACATGACAGATTATTTAATACAGTTGATTTTTTATG          |
| Identical peptides       | I K S L Q M A D R T L G M L M E G L K Q R N L H N C V N L I L L A D H G M E A I S C N R L E Y M T D Y F N T V D F F M                                                                  |
|                          | <b>F14</b> ..... <b>F15</b> .....                                                                                                                                                      |
| <i>N. naja</i> ENPP3     | TATGAAGGTGCAGCACTCGTATTTCGATCAAAAAATGTTCCAAAAGACTTTTATACATTTGATTCTGAAGCAATTGTTAAAAGCTTACATGCCGAAAGCCAAAACAGCACTTTAAAGCTTACTTGGCCAAAGACCTTCCAAAGAGACTACACTTTGCTAACAACATTCGCATTGAC       |
| <i>N. atra</i> ENPP3     | TATGAAGGTGCAGCACTCGTATTTCGATCAAAAAATGTTCCAAAAGACTTTTATACATTTGATTCTGAAGCAATTGTTAAAAGCTTACATGCCGAAAGCCAAAACAGCACTTTAAAGCTTACTTGGCCAAAGACCTTCCAAAGAGACTACACTTTGCTAACAACATTCGCATTGAC       |
| Identical peptides       | Y E G A A P R I R S K N V P K D F Y T F D S E A I V K K L T C R K P K Q H F K A Y L A K D L P K R L H F A N N I R I D                                                                  |
|                          | <b>F16</b> ..... <b>F17</b> .....                                                                                                                                                      |
| Identical exons          | AAAGTTAATCTGATGGTTGATCGACAGTGGTTGGCCGTGAGGAATAAAAAATATAAATATTGTTCTGGTGGTACCCATGGCTACGACAATGAATTTAAAAGTATGGAAGGTATCTTTTACACACGGGCCAGGCTTTAAGGAAAAAATGAGGTGACGTCTTTTGAAAACATTGAA         |
| Identical peptides       | K V N L M V D R Q W L A V R N K K Y K Y C S G G T H G Y D N E F K S M E A I F L A H G P G F K E K T E V T S F E N I E                                                                  |
|                          | <b>F18</b> .....                                                                                                                                                                       |
| Identical exons          | GTTTATACTTAATGTGTGATCTCCTGAAGCTTAAACCTGCTCCAACAATGGAACACATGGAAGCTTGAATCACCTCCTAAAAAATCCTTTCTACAATCCTTCTCCAGCAAAAGAACAACTCTCCTCCTTTTACTGCCTTTTTGGCCCCGTTCCAGTCAGATGTTTCAGGATGT          |
| Identical peptides       | V Y N L M C D L L K L K P A P N N G T H G S L N H L L K N P F Y N P S P A K E Q S P P L Y C L F G P V P S P D V S G C                                                                  |
|                          | <b>F19</b> ..... <b>F20</b> .....                                                                                                                                                      |
| Identical exons          | AAATGTAGCTCAATAACAGATTAGAAAGCAGTGAATCAAAGGTTAAACCTCATTGATCAAGCAAAAATGCAGTCTGAAGCTGATAATTGCGCTTATGGAAGACCCACGTTCTACAGCACAGCAAGTACTGCCTCCTTCCACAGACTAAATATATAAGCGCATATAGTCAAGACATC       |
| Identical peptides       | K C S S I T D L E A V N Q R L N L I D Q A K M Q S E A D N L P Y G R P H V L Q H S K Y C L L H Q T K Y I S A Y S Q D I                                                                  |
|                          | <b>F21</b> .....                                                                                                                                                                       |
| Identical exons          | TTGATGCCATTATGGAATTCATATACTATCAGCAAAATCACTGGTTAAACCAACTTCTGCCCTCCAGTGCTTCAGACTGTCTGCGGCTAGATGTTGGAATCCCAAGTTTCAAGTCAAACTTCTCCTCAACTACCAGCCAGACCTGGCTATCACCCCGGCTTCCCTATCCTCCC          |
| Identical peptides       | L M P L W N S Y T I S K S L V K P T S A P P S A S D C L R L D V R I P T V Q S Q T C S N Y Q P D L A I T P G F L Y P P                                                                  |
|                          | <b>F22</b> ..... <b>F23</b> .....                                                                                                                                                      |
| Identical exons          | GACTTCAGCTCATCTGGCCCTGAGCAGTATGATGCTCTAATTACTAGCAACATTGTTCTATGTACAAAGAATTTGCACGATTGTGGAATTACTTCCATAGTACCCTACTTCCAAAATATGCTACAGAGAGAAATGGACTAAATGTCATCAGTGGGCCTATTTTGTATTATAATTAT       |
| Identical peptides       | D F S S S G P E Q Y D A L I T S N I V P M Y K E F A R L W N Y F H S T L L P K Y A T E R N G L N V I S G P I F D Y N Y                                                                  |
|                          | <b>F24</b> .....                                                                                                                                                                       |
| Identical exons          | GATGGGCACCTTTGATCCTTATGACACAATCGATCAGTATGTAACAATACAAAGATTCCCATCCCAACCCATTACTTTGTTGTGCTGACTAGCTGTGAGAATTCAACCAAACTCCACTAACTGTCCACCAGGCTCTTGAAAGTTTGTCTTTTATCTCCCTCATCGTCTGAC            |
| Identical peptides       | D G H F D P Y D T I D Q Y V N N T K I P I P T H Y F V V L T S C E N S T K T P L N C P P G S L K V L S F I L P H R P D                                                                  |
|                          | <b>F25</b> .....                                                                                                                                                                       |
| <i>N. naja</i> ENPP3     | AACTCAGAGAGCTGTGCTGACAAATCACCAGACAATCTGTGGGTTGAAGAAAGAAATGCAGACTCATACAGCACGTGTTGCTGATGTGGAACCTCCTTACTGGTCTGGATTTTATTACAGGCTTAAACAACCTCTCTCAGAAACCTTCGATTGAAAACATTTCTGCCTATATTATA       |
| <i>N. atra</i> ENPP3     | AACTCAGAGAGCTGTGCTGACAAATCACCAGACAATCTGTGGGTTGAAGAAAGAAATGCAGACTCATACAGCACGTGTTGCTGATGTGGAACCTCCTTACTGGTCTGGATTTTATTACAGGCTTAAACAACCTCTCTCAGAAACCTTCGATTGAAAACATTTCTGCCTATATTATA       |
| Identical peptides       | N S E S C A D K S P D N L W V E E R M Q T H T A R V R D V E L L T G L D F Y S A L K Q P L S E T L R L K T F L P I F I                                                                  |
|                          | .....                                                                                                                                                                                  |
| Identical exons          | AACTCAGTTAACTGA                                                                                                                                                                        |
| Identical peptides       | N S V N *                                                                                                                                                                              |
