# Supplementary material for: The evolution and structure of snake venom phosphodiesterase (svPDE) highlight its importance in venom actions
Source: eLife journal article supplement (doi:10.7554/elife.83966), 2023-04-06
Supplement: supp [file elife-83966-supp-v1.zip]

|                                                                                         |                                                | E1          | E2 junction               |
|-----------------------------------------------------------------------------------------|------------------------------------------------|-------------|---------------------------|
| ENPP3-E1                                                                                |                                                |             |                           |
| [P] <i>P. molurus</i> (Python)                                                          | METLSAE--ETTLGEKSNLEIDCQTETLVKKSTLRKYKILCA     | VL          | FISLVVVALGGLGGLGKKSVEPQ   |
| [V] <i>P. flavoviridis</i> (Habu)                                                       | MEMFPEDKDETEMENKSTSDLDIFQKETIIKRSTLRKYKILCV    | VL          | FISLVAVALGGLGGLGKKSVQPQ   |
| [V] <i>B. jararaca</i> (Jararaca)                                                       | MEMFPEDTDETEMGEKSTLDLIDFQTERIIKRSTLRNYKILCV    | VL          | FISLVAVALGGLGGLGKESVQPQ   |
| [V] <i>P. mucrosquamatus</i> (TH)                                                       | MEMFPEDKDETEMEGKSTADLIDFQTETIIKRSTLRKYKILCV    | VL          | FISLVAVALGGLGGLGKKSVQPQ   |
| [V] <i>C. viridis</i> (PR)                                                              | MEMFPEDKDETEMGEKRTLDLVDFQTERIIKRSTLRKYKILCV    | VL          | FISLVAVTLGGLGGLGKEPVQPQ   |
| [V] <i>C. tigris</i> (TR)                                                               | MEMFPEDKDETEMGEKSTLDLVDFQTERIIKRSTLRKYKILCV    | VL          | FISLVAVTLGGLGGLGKESVQPQ   |
| [H] <i>M. thanlyinensis</i>                                                             | METISAN--EIDMGEKSIWD---HSEPIINKSTLRKYKILCV     | VL          | FISLVAVALGGLGGLGKKSVQPQ   |
| [H] <i>H. buccata</i> (MWS)                                                             | METISAN--EIDMGEKSTLDLKDSHSEPIIKRSTLRKYKILCV    | VL          | FISLVAVALGGLGGLGKESVQ--   |
| [C] <i>T. sirtalis</i> (CGS)                                                            | MEMLVAD--KTHMGERSTLDLTDSHTETIIKRSTLRKYKILCV    | VL          | FISLVAVALGGLGGLGKDSQQ--   |
| [C] <i>P. guttatus</i> (CS)                                                             | METIAAD--ETNFGEKSTLDLIDSHSETMIKRSTLRKYKILCV    | VL          | FISLVAVALGGLGGLGKEPEPPE   |
| [C] <i>P. catenifer</i> (GS)                                                            | METIAAD--KTNFGEKSTLDLIDSHSEKMIKRSTLRKYKILCV    | VL          | FISLVAVALGGLGGLGKEPESPE   |
| [C] <i>P. obsoletus</i> (WRS)                                                           | METIAAD--ETNFGEKSTLDLIDSHSETMIKRSTLRKYKILCV    | VL          | FISLVAVALGGLGGLGKEPESPE   |
| [C] <i>T. elegans</i> (WTGS)                                                            | METLVAD--KTHMGERSTLDLTDSHTETIIKRSTLRKYKILCV    | VL          | FISLVAVALGGLGGLGKDSQQQ-   |
| [C] <i>R. subminiatus</i> (RK)                                                          | METLAAD--ETDMGEKSTLDLIHNSSETIIKKSTLRKYKILCV    | VL          | FISLVAVTLGGLGGLGKDSQQQQ   |
| [C] <i>T. conanti</i>                                                                   | METLVAD--KTHMGERSTLDLTDSHTETIIKRSTLRKYKILCV    | VL          | FISLVTVALGGLGGLGKDSQQQ-   |
| [C] <i>T. nigriceps</i> (PBS)                                                           |                                                | DLVDFQAEIRI | KKSTLRKYKILCV             |
| [D] <i>H. nasicus</i> (WHS)                                                             | METLAVD--EVDMGEKSTLDLIDSQSETIIKRSTLKKYKILCV    | VL          | FISLVAVALGGLGGLGKESEQPQ   |
| [D] <i>C. lineatus</i>                                                                  | METFAAD--ETDMGEKSTLDLVDSHSETIIKRSTLRKYKILCV    | VL          | FISLVAVALGGLGGLGKESVQPQ   |
| [D] <i>H. leopardinus</i>                                                               | MQTLTAD--ETDMGENSTLDLVDSHSETIIKRSTLRKYKILCV    | VL          | FISLVAVALGGLGGLGKESVQPQ   |
| [L] <i>P. subtaeniatus</i> (WYSS)                                                       | METLPAE--ETEIGEKSLLDLDLIDSHPEKIVKRSTLRKYQILCL  | VL          | FISLVAVALGGLGGLGKLEPLTPQ  |
| [L] <i>P. schokari</i> (SSR)                                                            | METLPAE--ETEIGEKSLLDLDLIDSHPEKIVKRSTLRKYQILCL  | VL          | FISLVAVALGGLGGLGKLEPLTPQ  |
| [L] <i>M. monspessulanus</i> (MS)                                                       | VEMLPAE--ETDMGEKNLLDLDLIDSHSETIIVKRSTLRKYKILCV | VL          | FISLVAVALGGLGGLGKQKEPLPPQ |
| [E] <i>O. hannah</i> (KC)                                                               | METLPED--QTMGEKSTLDLIDSHTESVIKRSTLRKYKILCV     | VL          | FISLVAVALGGLGGLGKPSKQPQ   |
| [E] <i>N. scutatus</i> (MTS)                                                            | METLPAD--QTMGEKSTLELLDFHTETVIKKSTLRKYKILCV     | VL          | FISLVAVALGGLGGLGKQSKQPQ   |
| [E] <i>L. colubrina</i> (YSK)                                                           | METLPAD--QTMGEKSTLELLDSHTETVIKKSTLRKYKILCV     | VL          | FISLVAVALGGLGGLGKQSKQPQ   |
| [E] <i>W. aegyptia</i> (DC)                                                             | METLPED--QTMGEKSTLDLIDSHSETVIKRSTLMKYKILCV     | VL          | FISLVAVALGGLGGLGKQSKQPL   |
| [E] <i>H. haemachatus</i> (RH)                                                          | METLPED--QT---EKSTLDLIESHNETVIKRSTLMKYKILCV    | VL          | FISLVAVALGGLGGLGKQSKQPL   |
| [E] <i>N. annuliifera</i> (SC)                                                          | METLPEN--ETDMGEKSTLDLIDSHYETVIKRSTLMKYKILCV    | VL          | FISLVAVALGGLGGLGKQSKQPL   |
| [E] <i>N. atra</i> (CC)                                                                 | METLPEN--ETDVGEKSTLDLIDSHYETVIKRSTLMKYKILCV    | VL          | FISLVAVALGGLGGLGKQSKQPL   |
| [E] <i>N. haje</i> (EC)                                                                 | METLPEN--ETDMGEKSTLDLIDSHYETVIKRSTLMKYKILCA    | VL          | FISLVAVALGGLGGLGKQSKQPL   |
| [E] <i>N. kaouthia</i> (MC)                                                             | METLPEN--ETDVGEKSTLDLIDSHYETVIKRSTLMKYKILCV    | VL          | FISLVAVALGGLGGLGKQSKQPL   |
| [E] <i>N. naja</i> (IC)                                                                 | METLPEN--ETDVGEKSTLDLIDSHYETVIKRSTLMKYKILCV    | VL          | FISLVAVALGGLGGLGKQSKQPL   |
| [E] <i>N. nigricollis</i> (BSC)                                                         | METLPEN--ETDMGEKSTLDLIDSHYETVIKRSTLMKYKILCV    | VL          | FISLVAVALGGLGGLGKQSKQPL   |
| [E] <i>N. nivea</i> (Cape Cobra)                                                        | METLPEN--ETDMGEKSTLDLIDSHYETVIKRSTLMKYKILCV    | VL          | FISLVAVALGGLGGLGKQSKQPL   |
| [E] <i>N. pallida</i> (RSC)                                                             | METLPEN--ETDMGEKSTLDLIDSHYETVIKRSTLMKYKILCV    | VL          | FISLVAVALGGLGGLGKQSKQPL   |
| [E] <i>N. siamensis</i> (TSC)                                                           | METLPEN--ETDVGEKSTLDLIDSHYETVIKRSTLMKYKILCV    | VL          | FISLVAVALGGLGGLGKQSKQPL   |
| [E] <i>N. subfulva</i> (BFC)                                                            | METLPEN--ETDMGEKSTLDLIDSHYETVIKRSTLMKYKILCV    | VL          | FISLVAVALGGLGGLGKQSKQPL   |
| [E] <i>N. sumatrana</i> (ESC)                                                           | METLPEN--ETDVGEKSTLDLIDSHYETVIKRSTLMKYKILCV    | VL          | FISLVAVALGGLGGLGKQSKQPL   |
| [E] <i>N. mossambica</i> (MSC)                                                          | METLPEN--ETDMGEKSTLDLIDSHYETVIKRSTLMKYKILCV    | VL          | FISLVAVALGGLGGLGKQSKQPL   |
| [E] <i>N. nubiae</i> (NSC)                                                              | METLPEN--ETDMGEKSTLDLIDSHYETVIKRSTLMKYKILCV    | VL          | FISLVAVALGGLGGLGKQSKQPL   |
| [Hy] <i>H. curtus</i> (SSS)                                                             | METLPAD--QTDQGEKSTLELLDSHTETVIKKSTLKKYKILCV    | VL          | FISLVAVALGGLGGLGKQSKQPQ   |
| [Hy] <i>H. cyanocinctus</i> (BSS)                                                       | METLPAD--QTDKGEKSTLELLDSHTETVIKKSTLKKYKILCV    | VL          | FISLVAVALGGLGGLGKQSKQPQ   |
| PDE-E1a (Conserved in all snake genomes but not expressed in Elapidae and Hydrophiidae) |                                                |             |                           |
| [P] <i>P. molurus</i> (Python)                                                          |                                                | MTQQK       | VL                        |
| [V] <i>P. flavoviridis</i> (Habu)                                                       |                                                | MIQQK       | VL                        |
| [V] <i>B. jararaca</i> (Jararaca)                                                       |                                                | MIQQK       | VL                        |
| [V] <i>P. mucrosquamatus</i> (TH)                                                       |                                                | MIQQK       | VL                        |
| [V] <i>C. viridis</i> (PR)                                                              |                                                | MIQQK       | VL                        |
| [V] <i>C. tigris</i> (TR)                                                               |                                                | MIQQK       | VL                        |
| [H] <i>M. thanlyinensis</i>                                                             |                                                | MSLPK       | VL                        |
| [H] <i>H. buccata</i> (MWS)                                                             |                                                | MILPK       | VL                        |
| [C] <i>T. sirtalis</i> (CGS)                                                            |                                                | MSLQK       | VL                        |
| [C] <i>P. guttatus</i> (CS)                                                             |                                                | MSLQK       | VL                        |
| [C] <i>P. catenifer</i> (GS)                                                            |                                                | MSLQK       | VL                        |
| [C] <i>P. obsoletus</i> (WRS)                                                           |                                                | MSLQK       | VL                        |
| [C] <i>T. elegans</i> (WTGS)                                                            |                                                | MSLQK       | VL                        |
| [C] <i>R. subminiatus</i> (RK)                                                          |                                                | MSLQK       | VL                        |
| [C] <i>T. conanti</i>                                                                   |                                                | MSLQK       | VL                        |
| [C] <i>T. nigriceps</i> (PBS)                                                           |                                                | MIQQK       | VL                        |
| [D] <i>H. nasicus</i> (WHS)                                                             | MLKFLRTHPK                                     | VL          | FISLVAVALGGLGGLGKESEQPQ   |
| [L] <i>P. subtaeniatus</i> (WYSS)                                                       | MLKFLRTHPK                                     | VL          | FISLVAVALGGLGGLGKEPLTPQ   |
| [L] <i>P. schokari</i> (SSR)                                                            | MLKFLRTHPK                                     | VL          | FISLVAVALGGLGGLGKEPLTPQ   |
| [L] <i>M. monspessulanus</i> (MS)                                                       |                                                | MSLQK       | VL                        |
| [E] <i>O. hannah</i> (KC)*                                                              |                                                | MIMQN       | VL                        |
| [E] <i>N. scutatus</i> (MTS)*                                                           |                                                | M--QK       | VL                        |
| [E] <i>L. colubrina</i> (YSK)*                                                          |                                                | MIMQK       | VL                        |
| [E] <i>N. naja</i> (IC)*                                                                |                                                | MVMQK       | VL                        |
| [Hy] <i>H. curtus</i> (SSS)*                                                            |                                                | M--QK       | VL                        |
| [Hy] <i>H. cyanocinctus</i> (BSS)*                                                      |                                                | M--QK       | VL                        |
| PDE-E1b (Only found in the genomes and transcriptomes of Elapidae and Hydrophiidae)     |                                                |             |                           |
| [E] <i>O. hannah</i> (KC)                                                               | MRCKK                                          | VL          | FISLVAVALGGLGGLGKPSKQPQ   |
| [E] <i>N. scutatus</i> (MTS)                                                            | RCKKK                                          | VL          | FISLVAVALGGLGGLGKQSKQPQ   |
| [E] <i>L. colubrina</i> (YSK)                                                           | MRYYK                                          | VL          | FISLVAVALGGLGGLGKQSKQPQ   |
| [E] <i>W. aegyptia</i> (DC)                                                             | MRCKK                                          | VL          | FISLVAVALGGLGGLGKQSKQPL   |
| [E] <i>H. haemachatus</i> (RH)                                                          | MRCKK                                          | VL          | FISLVAVALGGLGGLGKQSKQPL   |
| [E] <i>N. annuliifera</i> (SC)                                                          | MRCKK                                          | VL          | FISLVAVALGGLGGLGKQSKQPL   |
| [E] <i>N. atra</i> (CC)                                                                 | MRFKK                                          | VL          | FISLVAVALGGLGGLGKQSKQPL   |
| [E] <i>N. haje</i> (EC)                                                                 | MRCKK                                          | VL          | FISLVAVALGGLGGLGKQSKQPL   |
| [E] <i>N. kaouthia</i> (MC)                                                             | MRFKK                                          | VL          | FISLVAVALGGLGGLGKQSKQPL   |
| [E] <i>N. naja</i> (IC)                                                                 | MRFKK                                          | VL          | FISLVAVALGGLGGLGKQSKQPL   |
| [E] <i>N. nigricollis</i> (BSC)                                                         | MRCKK                                          | VL          | FISLVAVALGGLGGLGKQSKQPL   |
| [E] <i>N. nivea</i> (Cape Cobra)                                                        | MRCKK                                          | VL          | FISLVAVALGGLGGLGKQSKQPL   |
| [E] <i>N. pallida</i> (RSC)                                                             | MRCKK                                          | VL          | FISLVAVALGGLGGLGKQSKQPL   |
| [E] <i>N. philippinensis</i> (PSC)                                                      | MRFKK                                          | VL          | FISLVAVALGGLGGLGKQSKQPL   |
| [E] <i>N. siamensis</i> (TSC)                                                           | MRFKK                                          | VL          | FISLVAVALGGLGGLGKQSKQPL   |
| [E] <i>N. subfulva</i> (BFC)                                                            | MRCKK                                          | VL          | FISLVAVALGGLGGLGKQSKQPL   |
| [E] <i>N. sumatrana</i> (ESC)                                                           | MRFKK                                          | VL          | FISLVAVALGGLGGLGKQSKQPL   |
| [E] <i>N. mossambica</i> (MSC)                                                          | MRCKK                                          | VL          | FISLVAVALGGLGGLGKQSKQPL   |
| [E] <i>N. nubiae</i> (NSC)                                                              | MRCKK                                          | VL          | FISLVAVALGGLGGLGKQSKQPL   |
| [Hy] <i>H. curtus</i> (SSS)                                                             | MRCKK                                          | VL          | FISLVAVALGGLGGLGKQSKQPQ   |
| [Hy] <i>H. cyanocinctus</i> (BSS)                                                       | MRCKK                                          | VL          | FISLVAVALGGLGGLGKQSKQPQ   |

\* Conserved in the genomes but not expressed in the transcriptomes (only selected sequences were shown).

Abbreviations for the common names:

Taiwanese habu (TH), Prairie rattlesnake (PR), Terrestrial rattlesnake (TR), Masked water snake (MWS), Common garter snake (CGS), Corn snake (CS), Gopher snake (GS), Western rat snake (WRS), Western terrestrial garter snake (WTGS), Red-necked keelback (RK), Plain black-headed snake (PBS), Western hognose snake (WHS), Western yellow-bellied sand snake (WYSS), Schokari sand racer (SSR), Montpellier snake (MS), King cobra (KC), Mainland tiger snake (MTS), Yellow-lipped sea krait (YSK), India cobra (IC), Desert cobra (DC), Rinkhals (RH), Snouted cobra (SC), Chinese cobra (CC), Egyptian cobra (EC), Monocled cobra (MC), Black-necked spitting cobra (BSC), Red spitting cobra (RSC), Philippine spitting cobra (PSC), Thai spitting cobra (TSC), Brown forest cobra (BFC), Equatorial spitting cobra (ESC), Mozambique spitting cobra (MSC), Nubian spitting cobra (NSC), Shaw's sea snake (SSS), Blue-banded sea snake (BSS).

Abbreviations for the clades:

Pythonidae (P), Viperidae (V), Homalopsidae (H), Colubridae (C), Dipsadidae (D), Lamprophiidae (L), Elapidae (E) and Hydrophiidae (Hy).
