# Supplementary material for: The evolution and structure of snake venom phosphodiesterase (svPDE) highlight its importance in venom actions
Source: eLife journal article supplement (doi:10.7554/elife.83966), 2023-04-06
Supplement: supp [file elife-83966-supp-v1.zip]

|                                    | svPDE-E1a                                                             | Intron                             | Shared E2                                  |
|------------------------------------|-----------------------------------------------------------------------|------------------------------------|--------------------------------------------|
| P   <i>P. molurus</i> (Python)     | ATGACCCAGCAGAAG GT                                                    | -----                              | AG GTTCTTTTCATTTCTTTGGTGGTTGTAGCCCTTGG     |
| V   <i>P. flavoviridis</i> (Habu)  | ATGATTTCAGCAGAAG GT                                                   | -----                              | AG GTTCTTTTCATTTCTTTGGTGGCTGTAGCCCTTGG     |
| V   <i>B. jararaca</i> (Jararaca)  | ATGATTTCAGCAGAAG GT                                                   | -----                              | AG GTTCTTTTCATTTCTTTGGTGGCTGTAGCCCTTGG     |
| V   <i>P. mucrosquamatus</i> (TH)  | ATGATTTCAGCAGAAG GT                                                   | -----                              | AG GTTCTTTTCATTTCTTTGGTGGCTGTAGCCCTTGG     |
| V   <i>C. viridis</i> (PR)         | ATGATTTCAGCAGAAG GT                                                   | -----                              | AG GTTCTTTTCATTTCTTTGGTGGCTGTAAACCCCTTGG   |
| V   <i>C. tigris</i> (TR)          | ATGATTTCAGCAGAAG GT                                                   | -----                              | AG GTTCTTTTCATTTCTTTGGTGGCTGTAAACCCCTTGG   |
| H   <i>M. thanlyinensis</i>        | ATGAGTCTGCCGAAG                                                       | -----                              | -----GTTCTTTTCATTTCTTTGGTGGCTGTAGCCCTTGG   |
| H   <i>H. buccata</i> (MWS)        | ATGATTCTGCCGAAG                                                       | -----                              | -----GTTCTTTTCATTTCTTTGGTGGCTGTAGCCCTTGG   |
| C   <i>T. sirtalis</i> (CGS)       | ATGAGTCTGCAGAAG GT                                                    | -----                              | AG GTTCTTTTCATTTCTTTGGTCGCTGTAGCCCTTGG     |
| C   <i>P. guttatus</i> (CS)        | ATGAGTCTGCAGAAG GT                                                    | -----                              | AG GTTCTTTTCATTTCTTTGGTGGCTGTAGCCCTTGG     |
| C   <i>P. catenifer</i> (GS)       | ATGAGTCTGCAGAAG GT                                                    | -----                              | AG GTTCTTTTCATTTCTTTGGTGGCTGTAGCCCTTGG     |
| C   <i>P. obsoletus</i> (WRS)      | ATGAGTCTGCAGAAG GT                                                    | -----                              | AG GTTCTTTTCATTTCTTTGGTGGCTGTAGCCCTTGG     |
| C   <i>T. elegans</i> (WTGS)       | ATGAGTCTGCAGAAG GT                                                    | -----                              | AG GTTCTTTTCATTTCTTTGGTCGCTGTAGCCCTTGG     |
| C   <i>R. subminiatus</i> (RK)     | ATGAGTCTGCAAAAG                                                       | -----                              | -----GTTCTTTTCATTTCTTTGGTGGCTGTAGCCCTTGG   |
| C   <i>T. conanti</i>              | ATGAGTCTGCAGAAG                                                       | -----                              | -----GTTCTTTTCATTTCTTTGGTCACTGTAGCCCTTGG   |
| C   <i>T. nigriceps</i> (PBS)      | ATGATTTCAGCAGAAG                                                      | -----                              | -----GTTCTTTTCATTTCTTTGGTGGCTGTAAACCCCTTGG |
| D   <i>H. nasicus</i> (WHS)*       | -----GGAAACTGGGACCAAAGATCTGGATCTCGACC                                 | ATGCTAAAGTTCTTAAGGACTCATCCAAAG     | -----GTTCTTTTCATTTCTTTGGTGGCTGTAGCCCTTGG   |
| D   <i>C. lineatus</i>             | ATGAGTCTGCAGAAGGTAAGGCATAGATACCAGGATAGGAAATTGGGACCAAAGATCTGGATCCCGACC | ATGCTAAAAATTCTGAAGGACTCATCCAAAA    | -----GTTCTTTTCATTTCTTTGGTGGCTGTAGCCCTTGG   |
| D   <i>T. baileyi</i> **           | ATGAGTCTGCAGAAGGTAAGGCATAGATACCAGGATAGGAAATTGGGACCAAAGATCTGGATCCCGACC | ATGCTAAAAATTCTGAAGGACTCATCCAAAA GT | AG GTTCTTTTCATTTCTTTGGTGGCTGTAGCCCTTGG     |
| L   <i>P. subtaeniatus</i> (WYSS)  | ACGAGTCTGCAGAAGGTAAGGCATAGACACCAGGATTGGAACCTGGGACCAAAGATCTGGATCTCGACC | ATGCTAAAGTTCTTAAGGACTCATCCAAAG     | -----GTTCTTTTCATTTCTTTGGTGGCTGTAGCCCTTGG   |
| L   <i>P. schokari</i> (SSR)       | ACGAGTCTGCAGAAGGTAAGGCATAGACACCAG-ATTGGAAACTGGGACCAAAGATCTGGATCTCGACC | ATGCTAAAGTTCTTAAGGACTCATCCAAAG     | -----GTTCTTTTCATTTCTTTGGTGGCTGTAGCCCTTGG   |
| L   <i>M. monspessulanus</i> (MS)  | ATGAGTCTGCAAAAG                                                       | -----                              | -----GTTCTTTTCATTTCTTTGGTGGCTGTAGCCCTTGG   |
| E   <i>O. hannah</i> (KC)#         | ATGATTATGCAGAAT GT                                                    | -----                              | AG GTTCTTTTCATTTCTTTGGTGGCTGTAGCCCTTGG     |
| E   <i>N. scutatus</i> (MTS)#      | ATG-----CAGAAG GT                                                     | -----                              | AG GTTCTTTTCATTTCTTTGGTGGCTGTAGCCCTTGG     |
| E   <i>L. colubrina</i> (YSK)#     | ATGATTATGCAGAAG GT                                                    | -----                              | AG GTTCTTTTCATTTCTTTGGTGGCTGTAGCCCTTGG     |
| E   <i>N. naja</i> (IC)#           | ATGGTTATGCAGAAG GT                                                    | -----                              | AG GTTCTTTTCATTTCTTTGGTGGCTGTAGCCCTTGG     |
| Hy   <i>H. curtus</i> (SSS)#       | ATG-----CAGAAG GT                                                     | -----                              | AG GTTCTTTTCATTTCTTTGGTGGCTGTAGCCCTTGG     |
| Hy   <i>H. cyanocinctus</i> (BSS)# | ATG-----CAGAAG GT                                                     | -----                              | AG GTTCTTTTCATTTCTTTGGTGGCTGTAGCCCTTGG     |

\* Missing of 5'end during sequencing was probably due to the nature of poly-A library preparation.

\*\* The most closely related species to *C. lineatus* with available genome.

# These sequences are conserved in the genomes but not expressed in the transcriptomes.

**Abbreviations for the common names:**

Taiwanese habu (TH), Prairie rattlesnake (PR), Terrestrial rattlesnake (TR), Masked water snake (MWS), Common garter snake (CGS), Corn snake (CS), Gopher snake (GS), Western rat snake (WRS), Western terrestrial garter snake (WTGS), Red-necked keelback (RK), Plain black-headed snake (PBS), Western hognose snake (WHS), Western yellow-bellied sand snake (WYSS), Schokari sand racer (SSR), Montpellier snake (MS), King cobra (KC), Mainland tiger snake (MTS), Yellow-lipped sea krait (YSK), India cobra (IC), Shaw's sea snake (SSS), Blue-banded sea snake (BSS), Philippine spitting cobra (PSC).

**Abbreviations for the clades:**

Pythonidae (P), Viperidae (V), Homalopsidae (H), Colubridae (C), Dipsadidae (D), Lamprophiidae (L), Elapidae (E) and Hydrophiidae (Hy).
