# Supplementary figures and images for: The evolution and structure of snake venom phosphodiesterase (svPDE) highlight its importance in venom actions
Source: eLife journal article supplement (doi:10.7554/elife.83966), 2023-04-06

**(A)**

svPDE/hENPP1

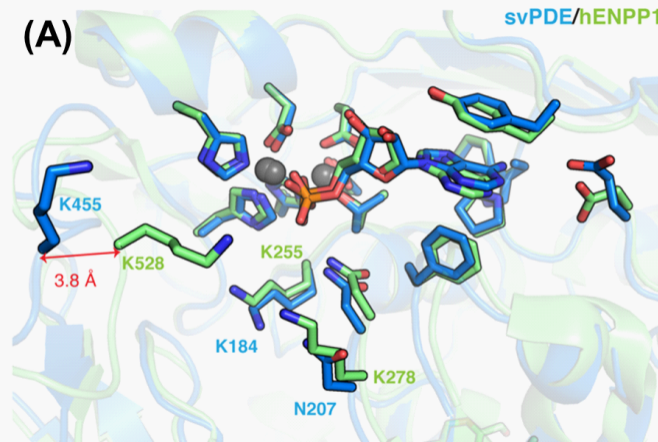**(B)**

svPDE/rENPP3

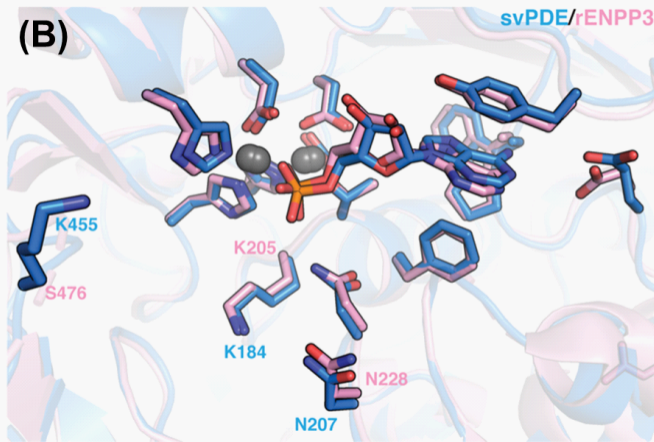

Supplement: supp [file elife-83966-supp-v1.zip]

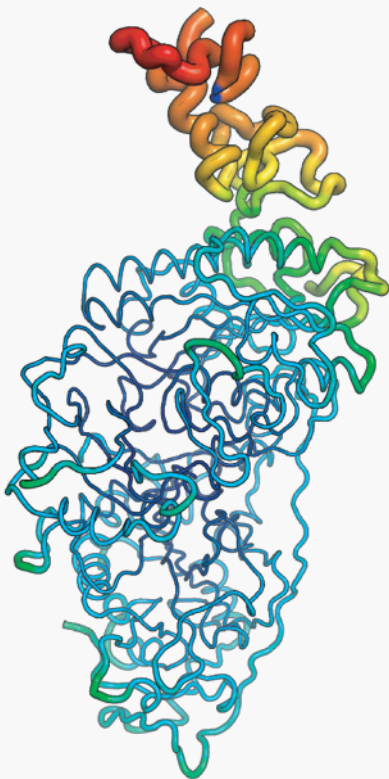

**Apo form**

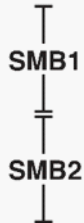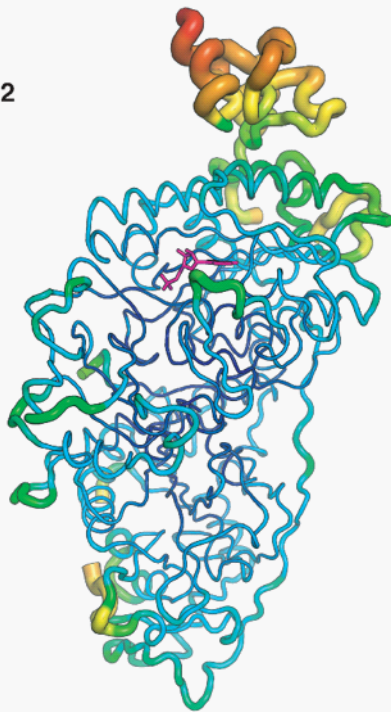

**AMP-complexed form**

Supplement: supp [file elife-83966-supp-v1.zip]

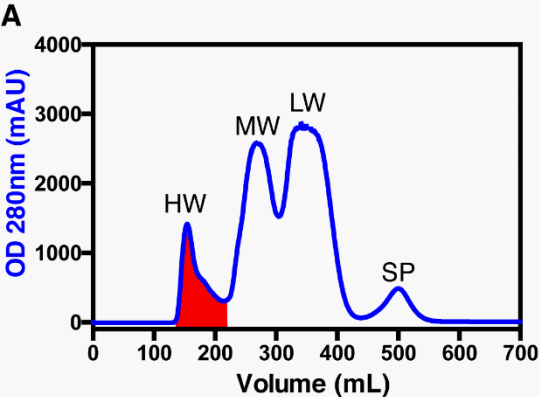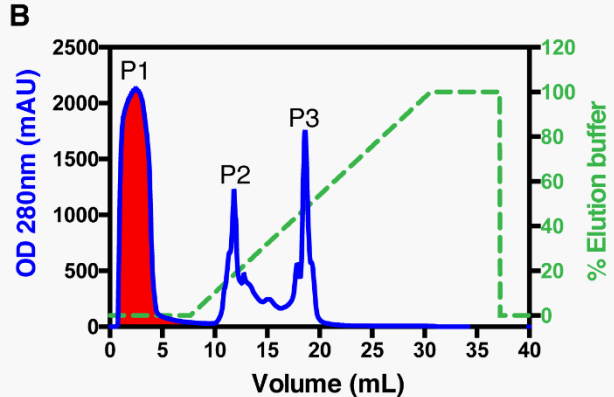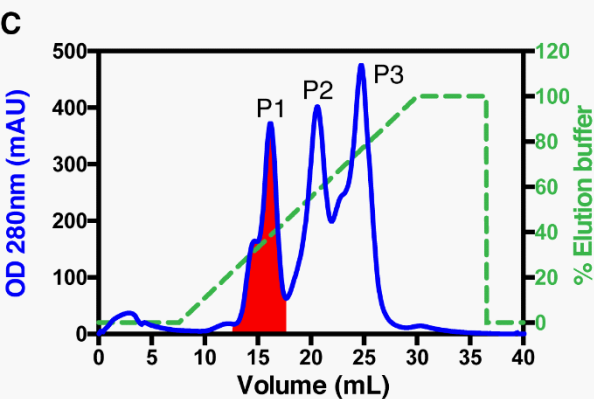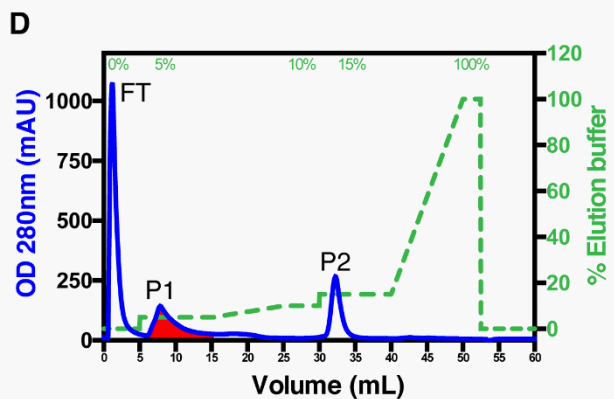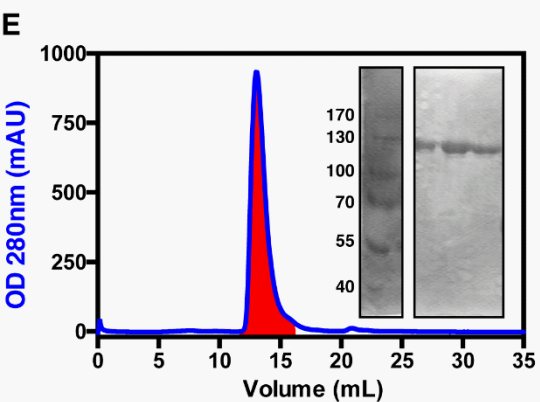

Supplement: supp [file elife-83966-supp-v1.zip]

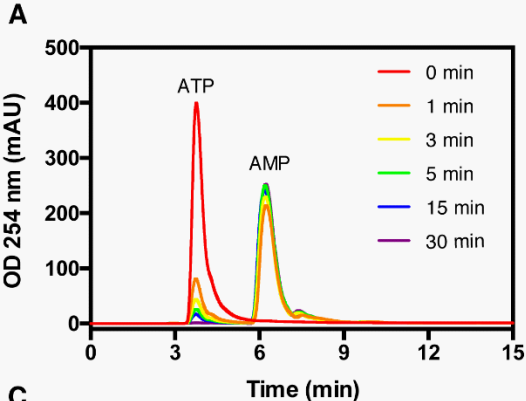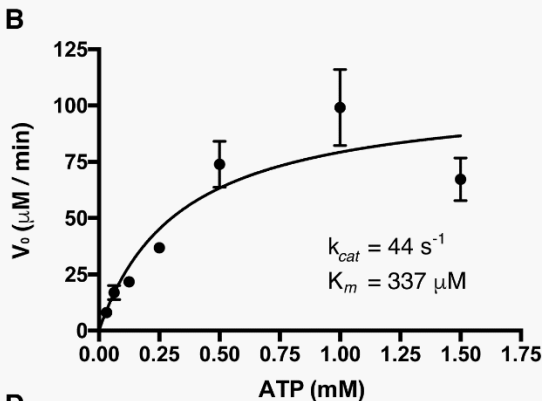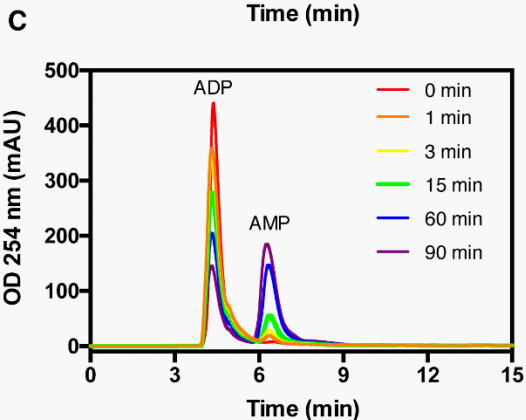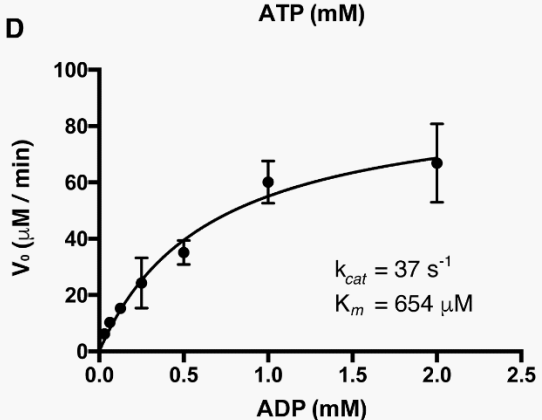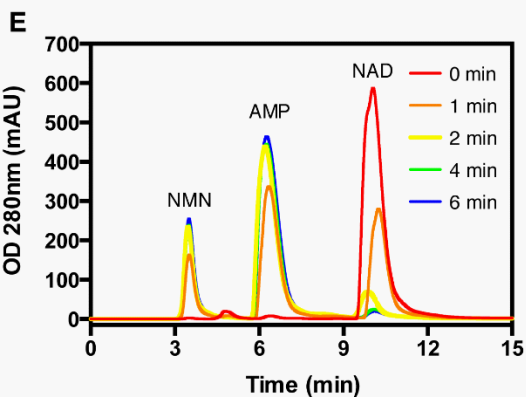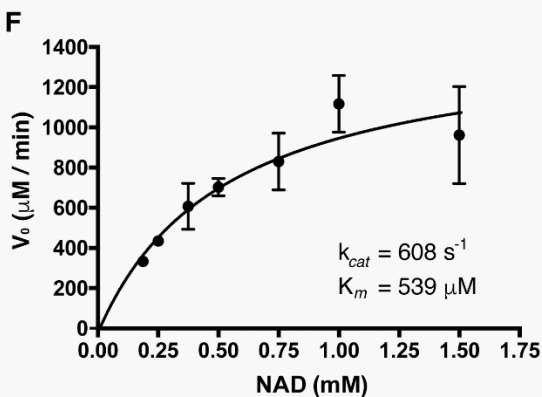

Supplement: supp [file elife-83966-supp-v1.zip]

|                 | N39                                                                               | N216                                                                              | N259                                                                               | N270                                                                               | N512                                                                                | N746                                                                                | N765                                                                                |                                                                                     |  |
|-----------------|-----------------------------------------------------------------------------------|-----------------------------------------------------------------------------------|------------------------------------------------------------------------------------|------------------------------------------------------------------------------------|-------------------------------------------------------------------------------------|-------------------------------------------------------------------------------------|-------------------------------------------------------------------------------------|-------------------------------------------------------------------------------------|--|
| Complex /Hybrid | 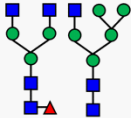  |  |  |                                                                                    |  |  |                                                                                     |  |  |
| High-mannose    |  |                                                                                   |   |  |  |                                                                                     |  |  |  |

■ GlcNAc

▲ Fucose

● Mannose

● Galactose

◆ Sialic acid

Supplement: supp [file elife-83966-supp-v1.zip]
